# Supplementary material
Source: PubMed Central journal article supplement (PMC3578312)
Supplement: NIHMS421914-supplement-1_si_001.pdf [file NIHMS421914-supplement-1_si_001.pdf]

# Supporting Information

NMR solution structure of an  $N^2$ -guanine DNA  
adduct derived from the potent tumorigen  
dibenzo[*a,l*]pyrene: Intercalation from the minor  
groove with ruptured Watson-Crick base pairing

Yijin Tang<sup>§</sup>, Zhi Liu<sup>§</sup>, Shuang Ding<sup>‡</sup>, Chin H. Lin<sup>§</sup>, Yuqin Cai<sup>‡</sup>, Fabian A. Rodriguez<sup>§</sup>, Jane M.  
Sayer<sup>‡</sup>, Donald M. Jerina<sup>⊥</sup>, Shantu Amin<sup>||</sup>, Suse Broyde<sup>‡</sup>, Nicholas E. Geacintov<sup>§,\*</sup>.

<sup>§</sup>Department of Chemistry and <sup>‡</sup>Biology, New York University, New York, NY 10003

<sup>‡</sup>Laboratory of Chemical Physics, National Institute of Diabetes and Digestive and Kidney  
Diseases, National Institutes of Health, DHHS, Bethesda, MD 20892

<sup>⊥</sup>Deceased.

<sup>||</sup>Department of Pharmacology, Penn State College of Medicine, Hershey, PA 17033

\*Corresponding author: (212) 998-8407, Fax (212) 998-8421, ng1@nyu.edu

## Table of Contents

### Experimental supplementary data.....3-6

**Figure S1. Expansion of TOCSY shows through bond connectivities of lesion protons.**

**Figure S2. Expansions of NOESY show details of intermolecular NOEs.**

**Table S3. Nucleic acid chemical shifts of the DB[*a,l*]P-dG•dC 11 mer duplex.**

**Table S4. Nucleic acid chemical shifts of the 11 mer unmodified duplex.**

### Molecular modeling and MD simulation supplementary data..... 7-13

#### MD simulation protocol

**Table S1. AMBER atom type, connection type, and partial charge assignments for the DB[*a,l*]P-dG adduct.**

**Table S2. Added force field parameters for the DB[*a,l*]P-dG adduct.**

**Figure S3. Superpositioned five structures of the DB[*a,l*]P-dG modified duplex.**

**Figure S4. Stereo view of the intercalation pocket.**

**Figure S5. Average values of helicoidal parameters and groove widths for the five selected DB[*a,l*]P-dG structures.**

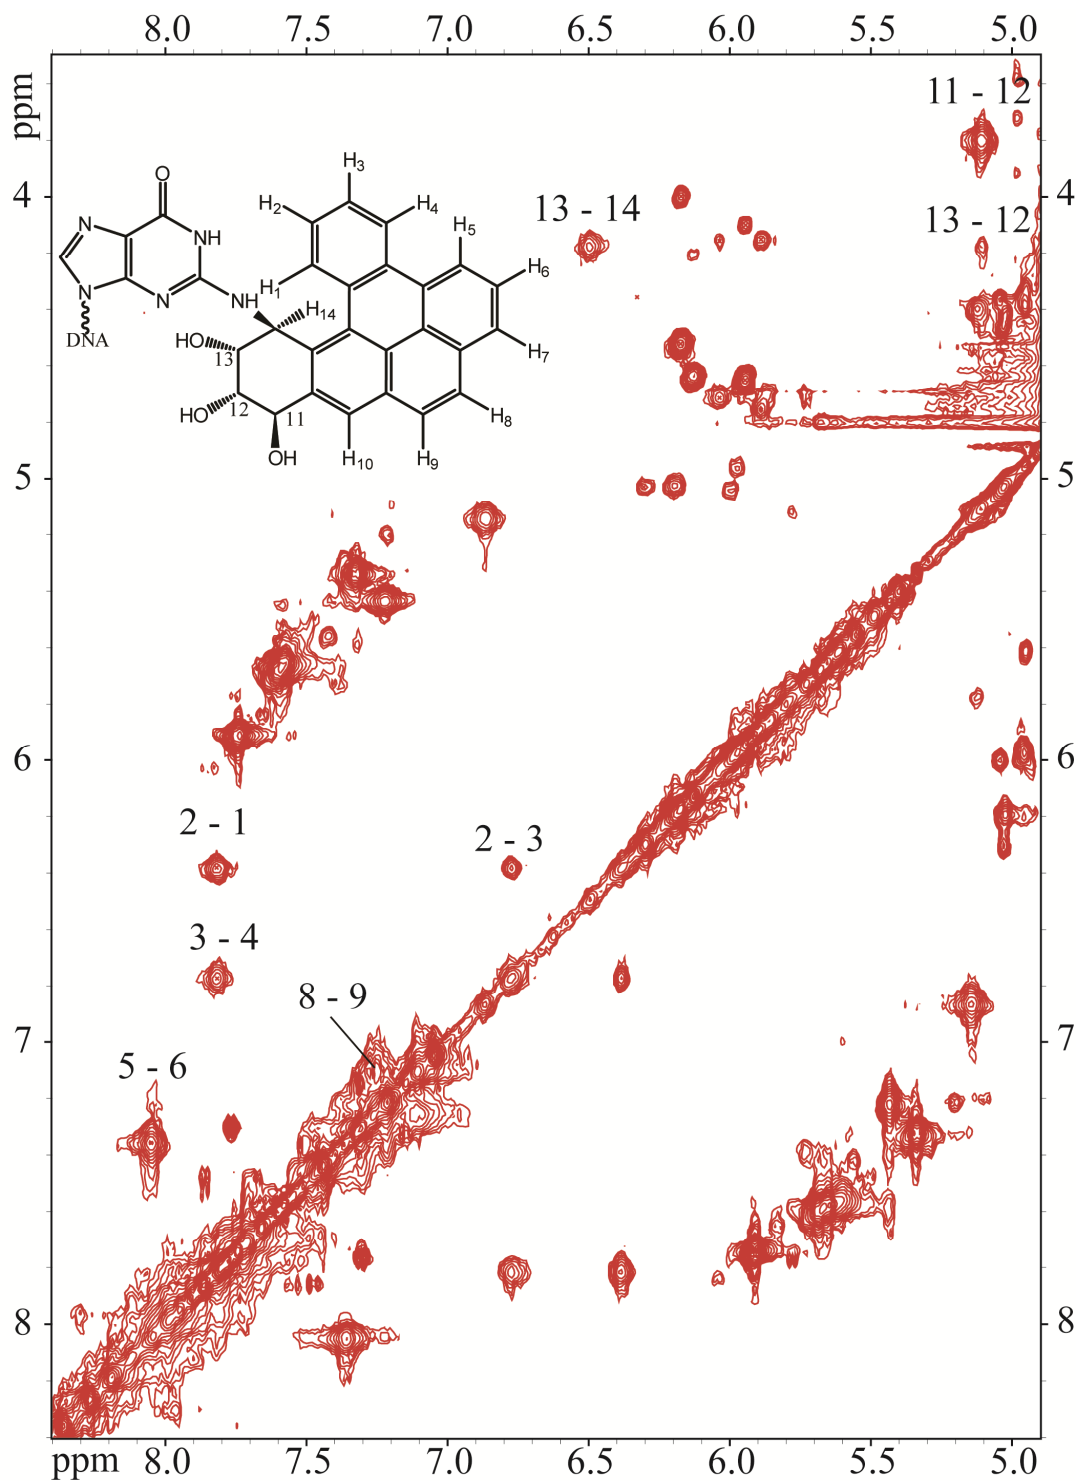

Figure S1. Expanded contour plot of a TOCSY spectrum (80 ms mixing time) of the DB[*a,l*]P-dG lesion in the same 11mer duplex in the same 11mer duplex in D<sub>2</sub>O aqueous buffer solution using a 500MHz spectrometer with a cryoprobe, at 15°C showing through-bond connectives of protons in the aromatic DB[*a,l*]P residue.

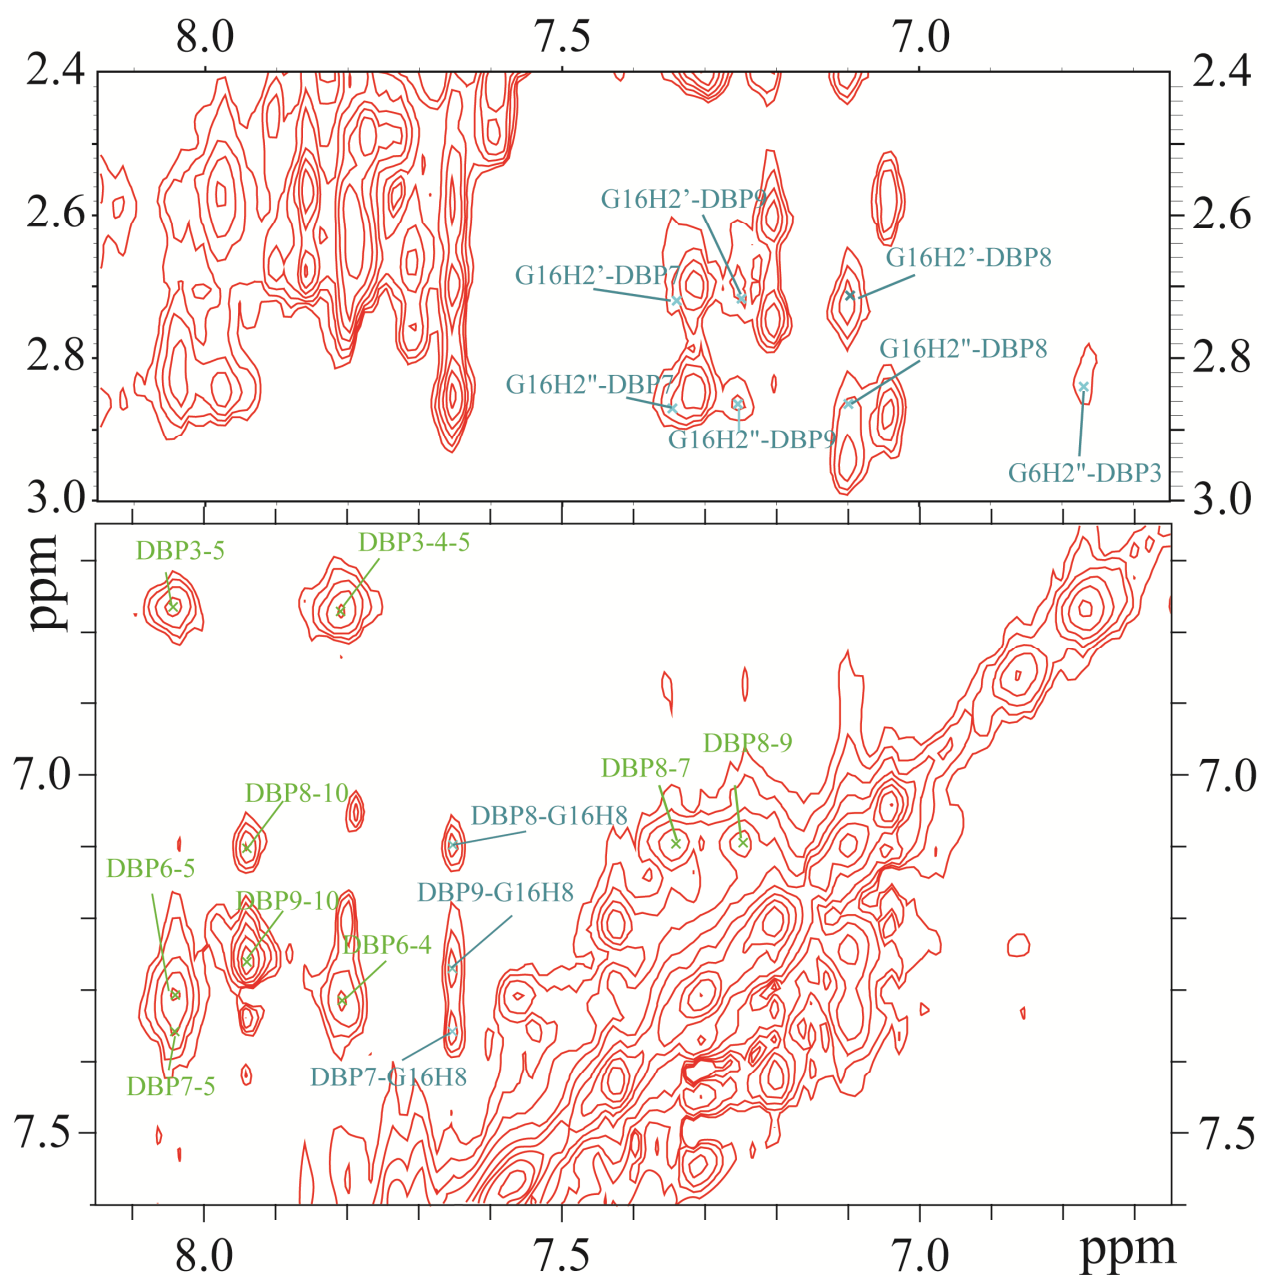

Figure S2. Expanded contour plot of a NOESY spectrum (300 ms mixing time) of the DB[*a,l*]P-dG lesion in the 11mer duplex in D<sub>2</sub>O aqueous buffer solution using a 500MHz spectrometer with a cryoprobe, at 15°C showing additional examples of intermolecular NOEs. The DB[*a,l*]P moiety is denoted by DBP.

Table S3. Nucleic acid chemical shifts of the DB[*a,l*]P-dG•dC 11 mer duplex.

|     | H1'  | H2'  | H2'' | H3'  | H4'  | H6/H8 | H2/H5/Me | Imino& amino*                         |
|-----|------|------|------|------|------|-------|----------|---------------------------------------|
| C1  | 5.93 | 2.07 | 2.49 | 4.63 | 4.09 | 7.73  | 5.91     | N.A.                                  |
| C2  | 5.39 | 2.18 | 2.42 | N.A. | 4.11 | 7.59  | 5.67     | 8.56 <sub>b</sub> /6.98 <sub>nb</sub> |
| A3  | 6.29 | 2.73 | 2.94 | 5.03 | 4.44 | 8.35  | 7.74     | 6.44 <sub>nb</sub> / N.A.             |
| T4  | 5.84 | 1.96 | 2.40 | N.A. | N.A. | 7.10  | 1.30     | 13.43                                 |
| C5  | 5.63 | 1.57 | 2.21 | N.A. | N.A. | 7.21  | 5.43     | 8.20 <sub>b</sub> /6.64 <sub>nb</sub> |
| G6  | 6.09 | N.A. | 2.82 | N.A. | N.A. | 8.04  | ----     | 11.79/6.51 <sub>nb</sub>              |
| C7  | 5.72 | 2.11 | 2.35 | 4.69 | 4.29 | 7.55  | N.A.     | 7.30 <sub>b</sub> /6.43 <sub>nb</sub> |
| T8  | 5.48 | 2.07 | 2.40 | N.A. | N.A. | 7.30  | 1.49     | 13.36                                 |
| A9  | 6.18 | 2.70 | 2.85 | 5.03 | 4.41 | 8.26  | 7.42     | 6.22 <sub>nb</sub> /N.A.              |
| C10 | 5.88 | 2.02 | 2.38 | 4.74 | 4.14 | 7.31  | 5.33     | 8.21 <sub>b</sub> /6.74 <sub>nb</sub> |
| C11 | 6.16 | N.A. | 2.22 | 4.51 | 3.99 | 7.57  | 5.63     | N.A.                                  |
| G12 | 5.67 | 2.57 | 2.68 | 4.79 | 4.16 | 7.86  | ----     | N.A.                                  |
| G13 | 5.97 | 2.60 | 2.75 | 4.95 | 4.37 | 7.80  | ----     | 12.80                                 |
| T14 | 5.54 | 2.02 | 2.30 | N.A. | N.A. | 7.21  | 1.36     | 13.56                                 |
| A15 | 5.99 | 2.57 | 2.84 | 5.05 | 4.36 | 7.98  | 7.18*    | 6.00 <sub>nb</sub> /N.A.              |
| G16 | 5.77 | 2.71 | 2.86 | 5.13 | 4.38 | 7.66  | ----     | 11.16                                 |
| C17 | 4.25 | 1.46 | 1.85 | N.A. | N.A. | 6.86  | 5.14     | N.A.                                  |
| G18 | 5.55 | 2.67 | 2.76 | N.A. | N.A. | 7.71  | ----     | 12.36                                 |
| A19 | 6.19 | 2.58 | 2.88 | 5.03 | 4.46 | 8.19  | 7.77     | 5.91 <sub>nb</sub> /N.A.              |
| T20 | 5.62 | 1.78 | 2.17 | 4.80 | 4.08 | 7.04  | 1.38     | 13.68                                 |
| G21 | 5.60 | 2.62 | 2.67 | N.A. | 4.31 | 7.79  | ----     | 12.90                                 |
| G22 | 6.12 | 2.32 | 2.49 | 4.63 | 4.19 | 7.77  | ----     | N.A.                                  |

\*Assigned from water NOESY.

'b' and 'nb' define hydrogen-bonded and non-hydrogen-bonded amino protons. Imino proton: no label.

N.A.: Unable to assign.

Table S4. Nucleic acid chemical shifts of the 5'-CCATCGCTACC-3' • 5'-GGTAGCGATGG-3' 11 mer unmodified duplex (Unpublished data, kindly provided by Dr. Monique Cosman).

|     | H1'  | H2'  | H2'' | H3'  | H4'  | H6/H8 | H2/H5/Me | Imino& amino*                          |
|-----|------|------|------|------|------|-------|----------|----------------------------------------|
| C1  | 5.95 | 2.07 | 2.50 | 4.64 | 4.08 | 7.72  | 5.91     | 7.93 <sub>b</sub> /6.93 <sub>nb</sub>  |
| C2  | 5.44 | 2.18 | 2.44 | 4.85 | 4.12 | 7.6   | 5.70     | 8.56 <sub>b</sub> /6.94 <sub>nb</sub>  |
| A3  | 6.32 | 2.75 | 2.97 | 5.04 | 4.45 | 8.38  | 7.78     | N.A.                                   |
| T4  | 5.87 | 2.01 | 2.43 | 4.83 | 4.17 | 7.15  | 1.41     | 13.58                                  |
| C5  | 5.65 | 2.00 | 2.38 | 4.75 | 4.1  | 7.4   | 5.54     | 8.38 <sub>b</sub> /6.80 <sub>nb</sub>  |
| G6  | 5.85 | 2.61 | 2.7  | 4.94 | 4.33 | 7.86  |          | 12.83                                  |
| C7  | 5.83 | 2.42 | 2.63 | 4.69 | 4.15 | 7.32  | 5.27     | 8.16 <sub>nb</sub> /6.55 <sub>nb</sub> |
| T8  | 5.64 | 2.10 | 2.43 | 4.84 | 4.12 | 7.36  | 1.63     | 13.7                                   |
| A9  | 6.19 | 2.70 | 2.85 | 5.00 | 4.4  | 8.28  | 7.49     | N.A.                                   |
| C10 | 5.91 | 2.04 | 2.41 | 4.81 | 4.18 | 7.32  | 5.38     | 8.20 <sub>b</sub> /6.71 <sub>nb</sub>  |
| C11 | 6.18 | 2.22 | 2.53 | 4.51 | 4.00 | 7.59  | 5.67     | 8.17 <sub>nb</sub> /7.0 <sub>nb</sub>  |
|     |      |      |      |      |      |       |          |                                        |
| G12 | 5.67 | 2.53 | 2.65 | 4.97 | 4.31 | 7.84  | ----     | N.A.                                   |
| G13 | 5.99 | 2.63 | 2.78 | 4.95 | 4.38 | 7.82  | ----     | 12.83                                  |
| T14 | 5.63 | 2.10 | 2.43 | 4.86 | 4.19 | 7.26  | 1.43     | 13.58                                  |
| A15 | 6.05 | 2.70 | 2.89 | 5.02 | 4.39 | 8.17  | 7.37     | N.A.                                   |
| G16 | 5.67 | 2.45 | 2.58 | 4.94 | 4.35 | 7.63  | ----     | 12.74                                  |
| C17 | 5.58 | 1.83 | 2.28 | 4.79 | 4.08 | 7.18  | 5.17     | 8.15 <sub>b</sub> /6.28 <sub>nb</sub>  |
| G18 | 5.61 | 2.58 | 2.79 | 4.93 | 4.35 | 7.85  | ----     | 12.67                                  |
| A19 | 6.18 | 2.58 | 2.87 | 4.99 | 4.42 | 8.15  | 7.75     | N.A.                                   |
| T20 | 5.65 | 1.76 | 2.17 | 4.79 | 4.07 | 7.02  | 1.37     | 13.68                                  |
| G21 | 5.62 | 2.51 | 2.61 | 4.98 | 4.34 | 7.85  | ----     | 12.89                                  |
| G22 | 6.12 | 2.48 | 2.34 | 4.63 | 4.19 | 7.76  | ----     | N.A.                                   |

\*Assigned from water NOESY.

'b' and 'nb' define hydrogen-bonded and non-hydrogen-bonded amino protons. Imino proton: no label.

N.A.: Unable to assign.

### *MD simulation protocol*

The duplex starting model was neutralized with 20 Na<sup>+</sup> ions and solvated with explicit water using the LEAP module of AMBER (43). A periodic rectangular box of TIP3P water with 10.0 Å buffer was created around the DNA. The particle-mesh Ewald (PME) method with a 9.0 Å cutoff for the nonbonded interactions was used in the subsequent energy minimizations and dynamic simulations. Initially, 500 steps of steepest descent minimization followed by 500 steps of conjugate gradient minimization were conducted for the waters and sodium ions with 500 kcal/(mol·Å<sup>2</sup>) restraints placed on the DNA duplex. Then, 1000 steps of steepest descent minimization followed by 1500 steps of conjugate gradient minimization were carried out for the entire system without restraints. A 2 fs time step and the SHAKE algorithm were applied in the MD simulations. The system was heated from 0 K to 300 K over 20 ps with a weak 10 kcal/(mol·Å<sup>2</sup>) restraint on the DNA at constant volume. The equilibration was continued with further 100 ps of simulation without restraint at constant atmospheric pressure. Finally, production was carried out for 3 ns at 300 K with a 4.0 ps heat bath coupling parameter.

Table S1. AMBER atom type, connection type, and partial charge assignments for the DB[*a,l*]P-dG adduct.

| Atom name           | Atom type | Connection type | Partial Charge |
|---------------------|-----------|-----------------|----------------|
| P                   | P         | M               | 1.221554       |
| O1P                 | O2        | E               | -0.79326       |
| O2P                 | O2        | E               | -0.79326       |
| O5'                 | OS        | M               | -0.495         |
| C5'                 | CT        | M               | -0.02793       |
| H5'1                | H1        | E               | 0.083211       |
| H5'2                | H1        | E               | 0.083211       |
| C4'                 | CT        | M               | 0.154291       |
| H4'                 | H1        | E               | 0.117104       |
| O4'                 | OS        | S               | -0.36758       |
| C1'                 | CT        | B               | 0.080502       |
| H1'                 | H2        | E               | 0.147042       |
| N9                  | N*        | B               | 0.001865       |
| C8                  | CK        | S               | 0.140741       |
| H8                  | H5        | E               | 0.179994       |
| C4                  | CB        | S               | 0.04708        |
| C5                  | CB        | B               | 0.296566       |
| N7                  | NB        | E               | -0.59984       |
| C6                  | C         | B               | 0.43052        |
| O6                  | O         | E               | -0.53893       |
| N1                  | NA        | B               | -0.27652       |
| H1                  | H         | E               | 0.29729        |
| C2                  | CA        | B               | 0.18175        |
| N3                  | NC        | E               | -0.33615       |
| N2                  | N2        | B               | -0.36203       |
| H21                 | H         | E               | 0.307353       |
| C14(B) <sup>a</sup> | CT        | B               | 0.040413       |
| H14(B)              | H1        | E               | 0.07281        |
| C13(B)              | CT        | 3               | 0.101951       |
| H13(B)              | H1        | E               | 0.094819       |
| O13(B)              | OH        | S               | -0.6675        |
| HO13(B)             | HO        | E               | 0.43427        |
| C12(B)              | CT        | 3               | 0.065868       |
| H12(B)              | H1        | E               | 0.116362       |
| O12(B)              | OH        | S               | -0.65771       |
| HO12(B)             | HO        | E               | 0.450859       |
| C11(B)              | CT        | 3               | 0.156184       |
| H11(B)              | H1        | E               | 0.099265       |
| O11(B)              | OH        | S               | -0.65249       |
| HO11(B)             | HO        | E               | 0.417551       |
| C16(B)              | CA        | S               | 0.029842       |
| C10(B)              | CA        | B               | -0.22052       |
| H10(B)              | HA        | E               | 0.157593       |
| C17(B)              | CA        | B               | 0.059497       |



|        |    |   |          |
|--------|----|---|----------|
| C18(B) | CA | E | -0.01349 |
| C9(B)  | CA | B | -0.13114 |
| H9(B)  | HA | E | 0.137418 |
| C8(B)  | CA | B | -0.25707 |
| H8(B)  | HA | E | 0.159075 |
| C20(B) | CA | B | 0.129922 |
| C21(B) | CA | E | 0.080957 |
| C7(B)  | CA | B | -0.19611 |
| H7(B)  | HA | E | 0.151182 |
| C6(B)  | CA | B | -0.18236 |
| H6(B)  | HA | E | 0.157873 |
| C5(B)  | CA | B | -0.16249 |
| H5(B)  | HA | E | 0.149984 |
| C22(B) | CA | S | -0.02138 |
| C23(B) | CA | S | 0.058432 |
| C4(B)  | CA | B | -0.19154 |
| H4(B)  | HA | E | 0.146901 |
| C3(B)  | CA | B | -0.13701 |
| H3(B)  | HA | E | 0.149525 |
| C2(B)  | CA | B | -0.1179  |
| H2(B)  | HA | E | 0.132053 |
| C1(B)  | CA | B | -0.20264 |
| H1(B)  | HA | E | 0.170153 |
| C24(B) | CA | S | 0.058928 |
| C19(B) | CA | S | -0.09264 |
| C15(B) | CA | E | 0.058864 |
| C3'    | CT | M | 0.063028 |
| H3'    | H1 | E | 0.116117 |
| C2'    | CT | B | -0.10959 |
| H2'1   | HC | E | 0.069536 |
| H2'2   | HC | E | 0.069536 |
| O3'    | OS | M | -0.5228  |

<sup>a</sup> (B): DB[*a,l*]P moiety.

Table S2. Added force field parameters for the DB[*a,l*]P-dG adduct.

| angle    | $K_{\theta}$ (kcal/(mol radian <sup>2</sup> )) | $\theta_{eq}$ (deg) |
|----------|------------------------------------------------|---------------------|
| OH-CT-CA | 50                                             | 109.5               |
| H1-CT-CA | 50                                             | 109.5               |
| N2-CT-CA | 80                                             | 111.2               |

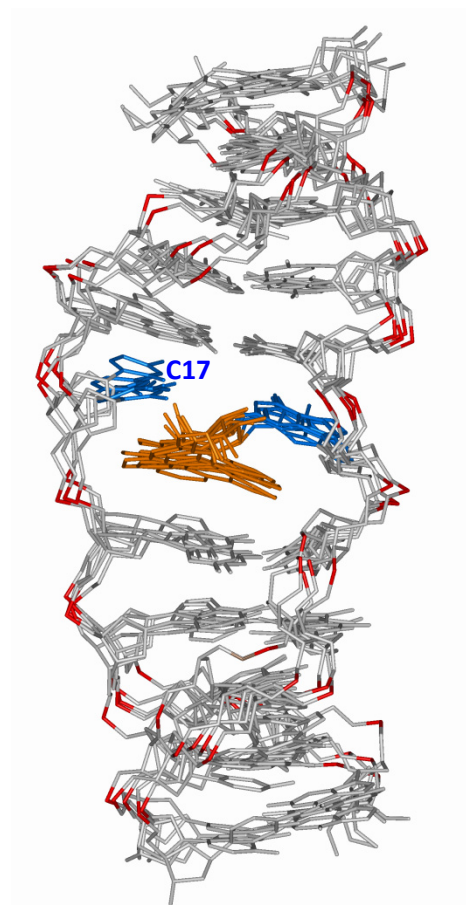

Figure S3. Superpositioned five structures of the DB[*a,l*]P-dG modified duplex that were extracted from the restrained MD simulation to best represent the NMR data; the view is from the minor groove. The DB[*a,l*]P moiety is in orange, the modified guanine and its partner cytosine are in blue, the phosphorus atoms are in red, and the rest of the DNA is in light gray. Hydrogen atoms in the DNA duplexes are not displayed for clarity.

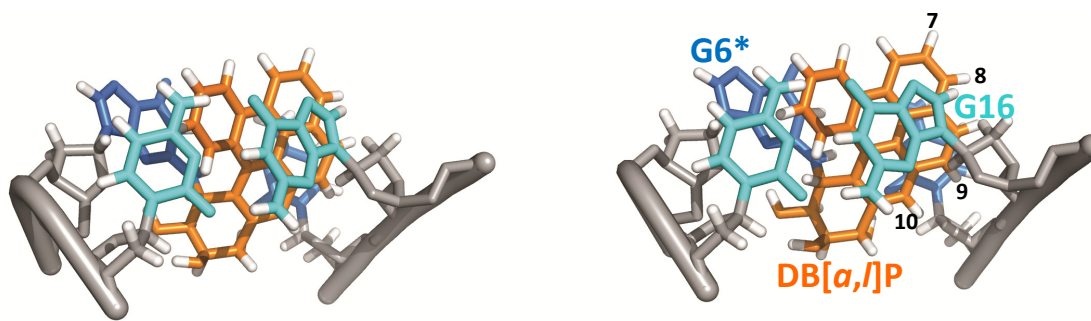

Figure S4. Stereo view of the DB[a,l]P moiety intercalated between dG6\*:dC17 and dC7:dG16. The DB[a,l]P is in orange, the modified guanine and its partner cytosine are in blue, the 3'-side base pair C7:G16 are in cyan, displayed hydrogen atoms are in white, and the rest of the DNA is in light gray. DB[a,l]P protons are numbered.

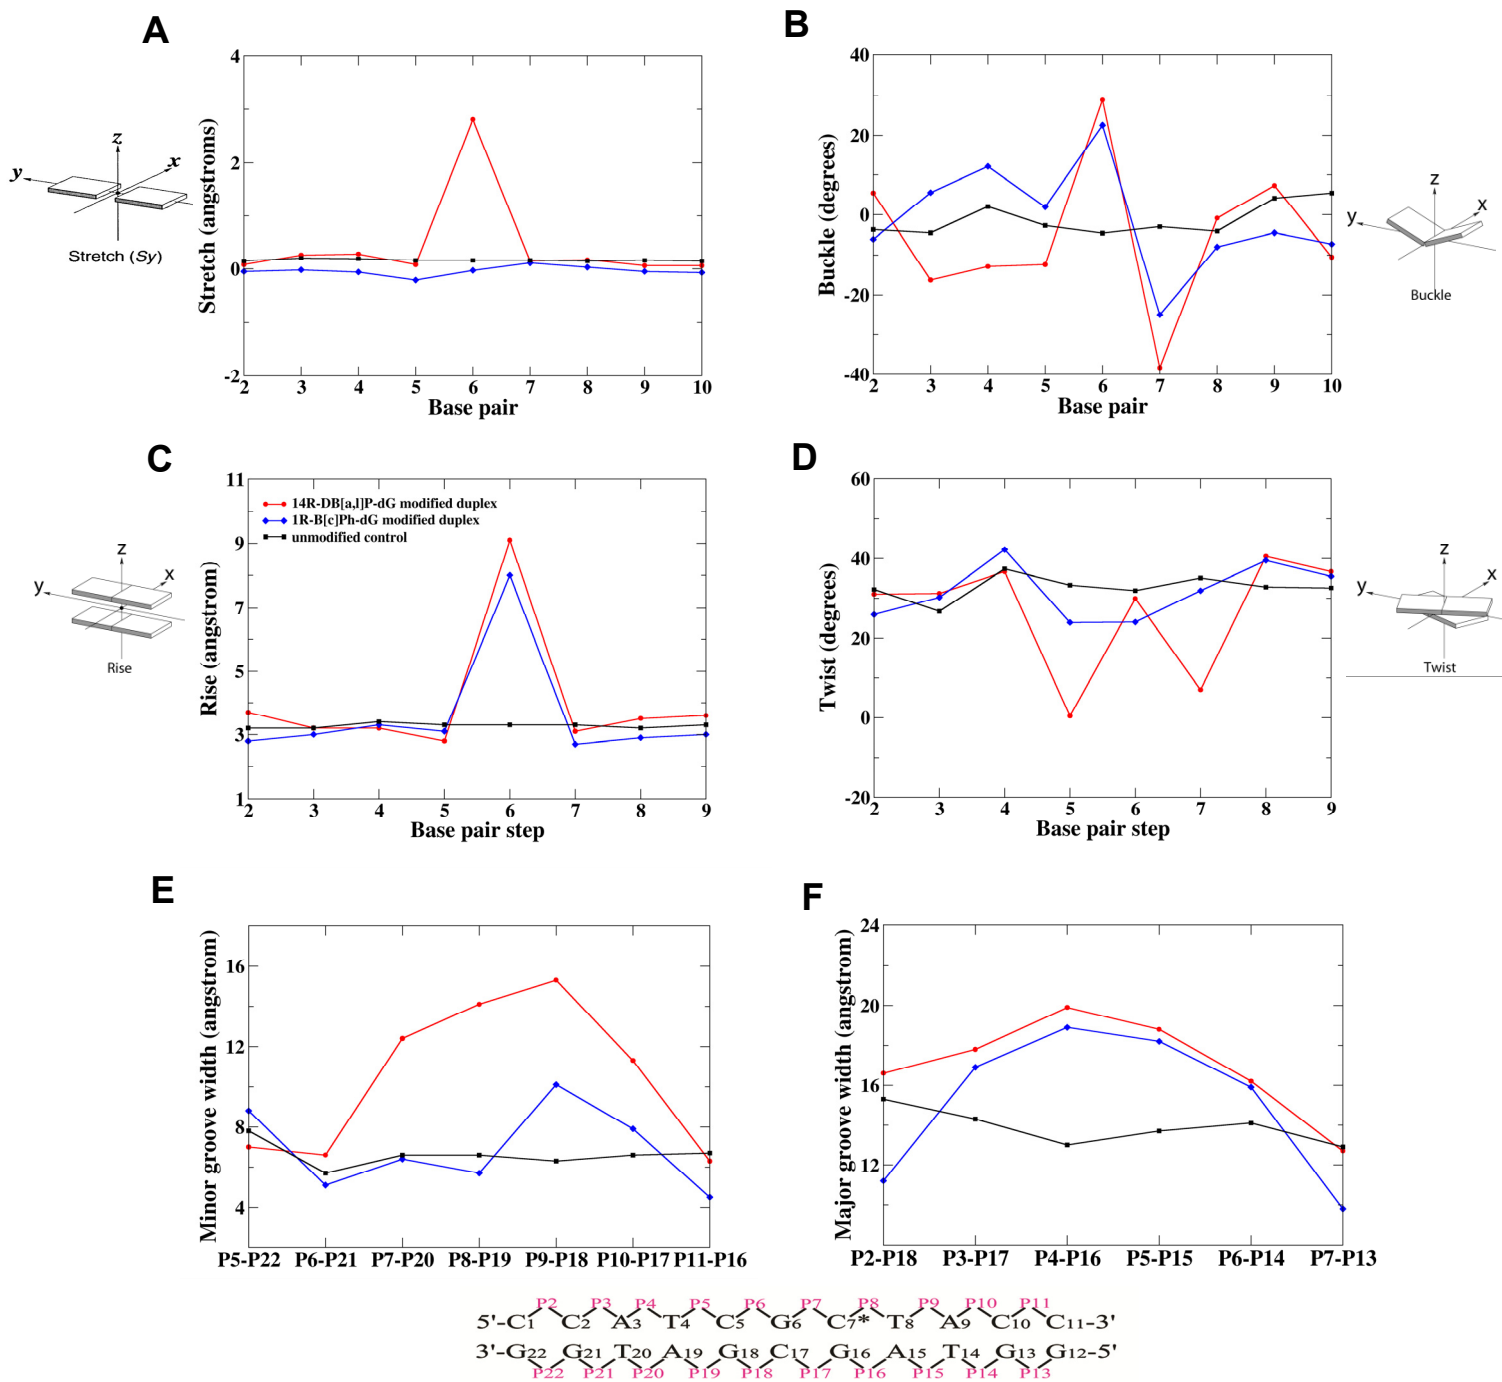

Figure S5. Average values of helicoidal parameters and groove widths for the five selected DB[a,l]P-dG structures (red). Unmodified control data (black) is from (67), and 1R-B[c]Ph-N<sup>2</sup>-dG (blue) is from the nine NMR solution structures deposited in the PDB (1HX4) (38). For Buckle and Propeller, C1·G22 is base pair 1, C2·G21 is base pair 2, etc.; For Rise and Twist, C1·G22 to C2·G21 is step 1, C2·G21 to A3·T20 is step 2, etc. The phosphate defining the groove dimensions are illustrated. The cartoons of helicoidal parameters are from Lu X. and Olson W. K. *Nucleic Acids Res.*(2003) 31, 5108-5121.
